# Costs of Screening for Pre-diabetes Among U.S. Adults

## A comparison of different screening strategies

PING ZHANG, PHD  
MICHAEL M. ENGELGAU, MD  
RODOLFO VALDEZ, PHD

STEPHANIE M. BENJAMIN, PHD  
BETSY CADWELL, MSPH  
K.M. VENKAT NARAYAN, MD

**OBJECTIVE** — We evaluated various strategies to identify individuals aged 45–74 years with pre-diabetes (either impaired glucose tolerance or impaired fasting glucose).

**RESEARCH DESIGN AND METHODS** — We conducted a cost analysis to evaluate the effectiveness (proportion of cases identified), total costs, and efficiency (cost per case identified) of five detection strategies: an oral glucose tolerance test (OGTT), a fasting plasma glucose (FPG) test, an HbA<sub>1c</sub> test, a capillary blood glucose (CBG) test, and a risk assessment questionnaire. For the first strategy, all individuals received an OGTT. For the last four strategies, only those with a positive screening test received an OGTT. Data were from the Third U.S. National Health and Nutrition Examination Survey, 2000 census, Medicare, and published literature. One-time screening costs were estimated from both a single-payer perspective and a societal perspective.

**RESULTS** — The proportion of pre-diabetes and undiagnosed diabetes identified ranged from 69% to 100% (12.1–17.5 million). The cost per case identified ranged from \$176 to \$236 from a single-payer perspective and from \$247 to \$332 from a societal perspective. Testing all with OGTT was the most effective strategy, but the CBG test and risk assessment questionnaire were the most efficient. If people are substantially less willing to take an OGTT than a FPG test, then the FPG testing strategy was the most effective strategy.

**CONCLUSIONS** — There is a tradeoff between effectiveness and efficiency in choosing a strategy. The most favorable strategy depends on if the goal of the screening program is to identify more cases or to pursue the lowest cost per case. The expected percentage of the population willing to take an OGTT is also a consideration.

*Diabetes Care* 26:2536–2542, 2003

Type 2 diabetes is a serious and costly disease and a growing public health problem (1,2). Despite the availability and use of a number of effective treatments to prevent diabetes complications, the disease pursues a degenerative path. Results of recent clinical trials indicate that the progression to diabetes from impaired glucose tolerance (IGT) can be de-

layed or prevented substantially by lifestyle modification or medications (3–5).

Responding to the results of the Diabetes Prevention Program (DPP) and other prevention trials, the American Diabetes Association (ADA) has recommended that diabetes prevention efforts target people with pre-diabetes (either IGT or impaired fasting glucose [IFG])

(6). To identify people with pre-diabetes, the ADA has recommended screening during a health care office visit for men and women who are age  $\geq 45$  years, particularly those with a BMI  $\geq 25$  kg/m<sup>2</sup>. The purpose of this study was to examine the effectiveness, costs, and efficiency of five strategies to identify people with pre-diabetes based on a one-time screening of the U.S. population.

## RESEARCH DESIGN AND METHODS

### Study population

Our study population included individuals age 45–74 years who visited a health care provider at least once in the past year and did not report a previous diagnosis of diabetes. To estimate the number in the U.S. population who were eligible, we first obtained the number of civilian people age 45–74 years from the 2000 census (80.3 million) (7). Second, using estimates from the Third U.S. National Health and Nutrition Examination Survey (8), we excluded 7.7 million (9.6%) people who had previously been diagnosed with diabetes. Finally, we excluded 18.2 million individuals (25%) who did not visit a health provider in the year 2000 (9). Therefore, the total number of people eligible for pre-diabetes screening in our study was 54.4 million. An estimated 70.9% of the population age 45–74 years had a BMI  $\geq 25$  kg/m<sup>2</sup> (8). If screening was restricted to those with a BMI  $\geq 25$  kg/m<sup>2</sup> in the targeted age-group, the eligible population would be further reduced to 37.4 million.

### Analytical procedures

**Detection strategies and evaluation measurements.** Our selection of strategies to detect pre-diabetes was based on information available on screening tests and the feasibility of large-scale screening in clinicians' offices. We examined five screening strategies: 1) testing all with an oral glucose tolerance test (OGTT), in which all individuals in the study popu-

From the Division of Diabetes Translation, Centers for Disease Control and Prevention, Atlanta, Georgia.

Address correspondence and reprint requests to Ping Zhang, Division of Diabetes Translation, Centers for Disease Control and Prevention, Mailstop K-10, 4770 Buford Highway NE, Atlanta, GA 30341. E-mail: paz2@cdc.gov.

Received for publication 14 January 2003 and accepted in revised form 30 May 2003.

**Abbreviations:** ADA, American Diabetes Association; CBG, capillary blood glucose; DPP, Diabetes Prevention Program; FPG, fasting plasma glucose; IFG, impaired fasting glucose; IGT, impaired glucose tolerance; OGTT, oral glucose tolerance test.

A table elsewhere in this issue shows conventional and Système International (SI) units and conversion factors for many substances.

© 2003 by the American Diabetes Association.

Table 1—Sensitivity and specificity of various tests for identifying prediabetes (IGT or IFG) or undiagnosed diabetes

| Identification test                                                                | All individuals age 45–74 years |                 | Individuals age 45–74 years and BMI $\geq 25$ kg/m <sup>2</sup> |                 | Source |
|------------------------------------------------------------------------------------|---------------------------------|-----------------|-----------------------------------------------------------------|-----------------|--------|
|                                                                                    | Sensitivity (%)                 | Specificity (%) | Sensitivity (%)                                                 | Specificity (%) |        |
| 2-h OGTT with cutoff value $\geq 140$ mg/dl in the testing all with OGTT strategy  | 100                             | 100             | 100                                                             | 100             | —      |
| FPG test with cutoff values $\geq 110$ mg/dl in the testing all with OGTT strategy | 100                             | 100             | 100                                                             | 100             | —      |
| $\geq 95$ mg/dl in the FPG testing strategy                                        | 87                              | 47              | 91                                                              | 37              | 8      |
| A1C test with cutoff values of $\geq 5.0\%$                                        | 91                              | 19              | 92                                                              | 17              | 8      |
| CBG test with a cutoff value of $\geq 100$ mg/dl                                   | 70                              | 67              | 70                                                              | 67              | 17     |
| Risk assessment questionnaire                                                      | 69                              | 54              | 69                                                              | 54              | 17     |

lation receive a 2-h OGTT; 2) fasting plasma glucose (FPG) testing, in which all people receive a FPG test and those who test positive but do not have IFG or undiagnosed diabetes would then be given an OGTT; 3) HbA<sub>1c</sub> screening, in which all individuals receive an HbA<sub>1c</sub> test and those who test positive would then be given an OGTT; 4) capillary blood glucose (CBG) screening, in which all individuals receive a CBG test and those who test positive would then be given an OGTT; and 5) a risk assessment questionnaire screening, in which all people respond to a risk assessment questionnaire for type 2 diabetes and those who score a total  $\geq 10$  points would then be given an OGTT (10).

Different cutoff values can be used to define positive cases for three of the strategies (FPG testing, HbA<sub>1c</sub> screening, and CBG screening). To assess the impact of different definitions of a positive case on our results, we examined multiple cutoff values used in clinical trials (5) or suggested in the literature (10–13). Three cutoff values were assessed for FPG testing (90, 95, and 110 mg/dl), three cutoff values for HbA<sub>1c</sub> screening (5.0%, 5.5%, and 6.0%), and five cutoff values for CBG screening (90, 100, 110, 120, and 140 mg/dl). The following cutoff values (a glucose level 95 mg/dl for FPG testing, an HbA<sub>1c</sub> level 5.0%, and a glucose value 100 mg/dl for CBG screening) yielded the lowest cost per case identified for each strategy and, thus, were selected for this study.

We measured the effectiveness of a detection strategy by the proportion of pre-diabetes and undiagnosed diabetes cases identified. We defined IGT, IFG, and undiagnosed diabetes using ADA or World Health Organization criteria (14,15). We included the number of un-

diagnosed diabetes identified in measuring the effectiveness because identification of undiagnosed diabetes is an unintentional but beneficial by-product of screening for pre-diabetes. We measured the total cost of a strategy by estimating the direct economic cost associated with screening everyone in our study population. We evaluated the efficiency of each strategy using the cost of detecting each case of pre-diabetes or undiagnosed diabetes. We also evaluated the effectiveness, cost, and efficiency of each detection strategy when screening for pre-diabetes was restricted to those age 45–74 years with a BMI  $\geq 25$  kg/m<sup>2</sup>.

**Estimating the effectiveness of each detection strategy.** The effectiveness of each detection strategy was measured by the proportion of cases identified, which by definition is equal to the sensitivity of the strategy. Information on the sensitivity and specificity of individual tests is presented in Table 1. For the purpose of this study, we assumed that the OGTT and FPG were both 100% sensitive and specific for identifying IGT, IFG, and undiagnosed diabetes.

**Estimating the total cost and efficiency of each detection strategy.** We included both medical and nonmedical costs in estimating the direct cost of each strategy. Medical costs included laboratory tests, personnel time, and other material costs (e.g., costs of copying and mailing). Non-medical costs included transportation to a health care provider and patient's time spent traveling and receiving tests. The total direct cost for each strategy was calculated as a sum of the cost associated with various resources (e.g., physician time, laboratory tests) used. The cost of each resource was the product of the following three components: number of

physical units used to screen one person, the unit value of the resource, and the number of individuals screened. The resources used and their unit values by detection strategy are presented in Table 2.

The cost of a laboratory test was based on Medicare reimbursement rates (16). Physician fees were estimated from HealthCare Consultants of America (17). Transportation costs to a health provider were obtained from the literature (18,19). The cost of time for medical office staffs other than physicians and patients was obtained from the Bureau of Labor Statistics (20). All costs were expressed in U.S. dollars for the year 2000.

The cost of identifying one case was calculated as the total cost of a detection strategy divided by the total number of cases identified. We estimated the unit cost from two perspectives: a single-payer health care system perspective, which included only the direct medical cost, and a societal perspective, which included both the direct medical and nonmedical costs.

**Sensitivity analysis.** We examined several factors that may have important effects on study outcomes. These factors included: <100% adherence to each screening strategy, changes in the prevalence of pre-diabetes and undiagnosed diabetes, and the need for an OGTT test to confirm identified cases. In our base case analysis, we assumed 100% adherence for each detection strategy. This is unlikely if testing is carried out in a normal clinical setting. There are many reasons why patients may not desire to be screened, such as a lack of perceived benefit and cost of the visits. Health care providers may not follow the recommended guidelines due to lack of time and financial incentive. In addition, adherence would likely vary by detection strategy. For example, adher-

Table 2—Resources used and their unit values associated with each detection strategy

| Cost categories    | Testing all with OGTT | Resource uses |                             |               |                                         | Unit costs               |
|--------------------|-----------------------|---------------|-----------------------------|---------------|-----------------------------------------|--------------------------|
|                    |                       | FPG testing   | HbA <sub>1c</sub> screening | CBG screening | Risk assessment questionnaire screening |                          |
| Physician time     | 3/4 visits            | 3/4 visits    | 3/4 visits                  | 3/4 visits    | 3/4 visits                              | \$51.00/visit            |
| Secretary time     | 1/12 h                | 1/6 h         | 1/12 h                      | 1/12 h        | 1/12 h                                  | \$15.96/h                |
| Lab test           | 1 OGTT                | 1 FPG; 1 OGTT | 1 HbA <sub>1c</sub> 1 OGTT  | 1 CBG; 1 OGTT | 1 questionnaire; 1 OGTT                 | \$17.22/OGTT; \$5.24/FPG |
| Other direct costs | 1 mail                | 2 mails       | 2 mails                     | 1 mail        | 1 mail                                  | \$1.00/mail              |
| Patient time       | 3.25 h                | 4.0 h         | 3.25 h                      | 3.25 h        | 3.25 h                                  | \$8.00/h                 |
| Travel cost        | 1 trip                | 2 trips       | 1 trip                      | 1 trip        | 1 trip                                  | \$7.00/trip              |

ence for an OGTT may be lower than a FPG test alone because of the time needed and inconvenience of the OGTT. We examined how the results of our base case analysis changed when adherence to the FPG test was 75% and that to the OGTT was 50%.

Further, the prevalence of pre-diabetes and undiagnosed diabetes differs by subpopulations and changes over time. For example, the prevalence of pre-diabetes and undiagnosed diabetes is higher for African Americans (21). Prevalence may also decrease if screening was performed every 3 years, as the ADA recommends (6). Thus, we examined how a 25% change in the prevalence of pre-diabetes and undiagnosed diabetes would affect the study results.

Finally, we assumed FPG and OGTT were 100% sensitive and specific for identifying pre-diabetes and undiagnosed diabetes. This is a reasonable assumption considering FPG and OGTT are the current “gold standards” for defining pre-diabetes and diabetes (14,15). However, there are reasons, such as intraindividual reproducibility, to believe these tests are “less than perfect.” Additionally, confirmation tests may be needed before treatments are initiated. In fact, the ADA recommends retesting anyone with an abnormal test to confirm the result (6). Thus, we examined the effect of adding a confirmatory OGTT to each strategy. We assumed that this additional OGTT would result in a 10% rate of false-positive cases.

## RESULTS

### Effectiveness of the detection strategy

Among the 54.4 million people who met our inclusion criteria for the year 2000, we estimated that 12.1 million people would have pre-diabetes and 5.4 million

would have undiagnosed diabetes. If screening was restricted to those with BMI  $\geq 25$  kg/m<sup>2</sup>, 37.4 million people would be screened, 9.6 million of whom would have pre-diabetes and 4.7 million undiagnosed diabetes. The proportion of pre-diabetes and undiagnosed diabetes cases identified ranged from 69% to 100% (12.1–17.5 million). If the screening was carried out among those with BMI  $\geq 25$  kg/m<sup>2</sup>, the proportion of pre-diabetes and undiagnosed diabetes cases identified remained the same as for screening all individuals, but the numbers of cases reduced to a range from 9.8 to 14.3 million. The number of pre-diabetes or undiagnosed diabetes cases identified per 1,000 people screened ranged from 153 to 222 with no BMI restriction and from 175 to 259 with the BMI restriction. Testing all with OGTT was the most effective, followed by HbA<sub>1c</sub> screening and FPG testing.

### Efficiency of the detection strategy

The total costs (direct medical and direct nonmedical costs) for screening 54.4 million individuals age 45–74 years who visited a health care provider in the U.S. during the previous year ranged from \$3.03 to \$5.30 billion (Table 3), whereas the direct medical costs alone ranged from \$2.16 to \$3.76 billion. The total cost per 1,000 people screened ranged from \$55,300 to \$96,000, and the direct medical costs alone ranged from \$39,500 to \$68,700. HbA<sub>1c</sub> screening had the highest cost, followed by testing all with OGTT and FPG testing. CBG screening had the lowest cost. The total cost (medical and nonmedical costs) was lower when screening was restricted to the 37.4 million individuals who had a BMI  $\geq 25$  kg/m<sup>2</sup> (Table 3).

The cost per case of pre-diabetes or undiagnosed diabetes identified varied by

detection strategy (Table 3). From a single payer perspective, the costs per case identified ranged from \$176 to \$236, with HbA<sub>1c</sub> screening being the highest cost strategy and CBG screening being the lowest cost strategy. All strategies, with the exception of HbA<sub>1c</sub> screening, cost  $< \$200$  per case identified. From a societal perspective, the cost per case of pre-diabetes or undiagnosed diabetes identified ranged from \$247 to \$332 (Table 3). Again, HbA<sub>1c</sub> screening was the most expensive strategy, and CBG screening was the least expensive strategy.

The cost per case identified for each strategy was lower when screening was restricted to those individuals with a BMI of  $\geq 25$  kg/m<sup>2</sup>. It ranged from \$153 to \$200 from a single payer perspective and from \$215 to \$282 from a societal perspective (Table 3).

### Comparisons of effectiveness and efficiency of different strategies

The proportion of cases missed and the cost per case identified by each strategy are presented in Fig. 1. The vertical axis represents the percent of cases missed, and the horizontal axis represents the cost per case identified. The closer a point is to the origin, the more efficient the strategy represented by that point. This curve (sometimes referred to as an “efficiency frontier”) represents the “best” combination of effectiveness and efficiency that could be achieved based on the five screening strategies evaluated. The points off the curve represent an inferior strategy because the same proportion of cases could be identified at a lower cost or a high proportion of the cases could be identified at the same cost. HbA<sub>1c</sub> screening was an inferior strategy compared with testing all with OGTT. There was a tradeoff between the proportion identi-

**Table 3—Total and unit costs of prevalence-based screening for prediabetes (IGT or IFG) or undiagnosed diabetes, individuals age 45–74 years by payers' perspective and detection strategy**

| Case detection strategies                            | Societal perspective                                       |                                                  |                                         |                                                  | Single payer perspective                   |                                                  |                                        |                                                  |
|------------------------------------------------------|------------------------------------------------------------|--------------------------------------------------|-----------------------------------------|--------------------------------------------------|--------------------------------------------|--------------------------------------------------|----------------------------------------|--------------------------------------------------|
|                                                      | Total direct medical and nonmedical costs (billion U.S.\$) |                                                  | Costs per case identified (U.S.\$/case) |                                                  | Total direct medical cost (billion U.S.\$) |                                                  | Cost per case identified (U.S.\$/case) |                                                  |
|                                                      | All individuals                                            | Individuals with BMI $\geq 25$ kg/m <sup>2</sup> | All individuals                         | Individuals with BMI $\geq 25$ kg/m <sup>2</sup> | All individuals                            | Individuals with BMI $\geq 25$ kg/m <sup>2</sup> | All individuals                        | Individuals with BMI $\geq 25$ kg/m <sup>2</sup> |
| Testing all with OGTT                                | 5.23                                                       | 3.59                                             | 299                                     | 252                                              | 3.44                                       | 2.36                                             | 196                                    | 165                                              |
| FPG testing with a cutoff values of $\geq 95$ mg/dl  | 4.86                                                       | 3.56                                             | 319                                     | 274                                              | 2.93                                       | 2.13                                             | 192                                    | 164                                              |
| A1C screening with cutoff values of $\geq 5.0\%$     | 5.30                                                       | 3.70                                             | 332                                     | 282                                              | 3.76                                       | 2.62                                             | 236                                    | 200                                              |
| CBG screening with cutoff values of $\geq 100$ mg/dl | 3.03                                                       | 2.15                                             | 247                                     | 215                                              | 2.16                                       | 1.53                                             | 176                                    | 153                                              |
| Risk assessment questionnaire screening              | 3.17                                                       | 2.22                                             | 263                                     | 225                                              | 2.16                                       | 1.51                                             | 179                                    | 153                                              |

fied and the costs per case identified among FPG testing, HbA<sub>1c</sub> screening, and CBG screening. Although the risk assessment questionnaire was off the “efficiency frontier” curve, the difference in both the proportion of cases missed and cost per case identified was small compared with the CBG screening strategy.

### Sensitivity analysis

Reducing adherence by 25% for the FPG test and by 50% for the OGTT lowered the number of cases detected and thus the

effectiveness (Table 4). Compared with a 100% adherence, total medical costs of implementing each strategy decreased, but costs per case identified increased (Tables 3 and 4). In addition, lower adherence made FPG testing the most effective strategy and changed the efficiency rankings of the strategies.

A higher or lower prevalence of prediabetes and undiagnosed diabetes would affect the number of pre-diabetes and undiagnosed diabetes cases identified but would not change the effectiveness. Addi-

tionally, a higher or lower prevalence would affect the total cost for all detection strategies (except testing all with OGTT), as well as the efficiency for all detection strategies. Finally, a higher prevalence of pre-diabetes and undiagnosed diabetes would affect the efficiency ranking of each strategy, which favors high-sensitivity strategies. However, with either a 25% increase or a 25% decrease in the prevalence of pre-diabetes and undiagnosed diabetes, the CBG screening strategy remained the most efficient strategy.

Adding a confirmatory OGTT for all identified cases (assuming a 10% false-positive rate) would increase both the total cost and cost per case identified for each strategy. The cost per case identified would range from \$252 to \$318 from a single payer perspective and from \$365 to \$459 from a societal perspective. These costs represented a range of increase between 35% and 43% from a single payer perspective and an increase of between 38% and 48% from a societal perspective, compared with the efficiency estimates from our base case analysis. However, efficiency rankings of the five strategies remained the same.

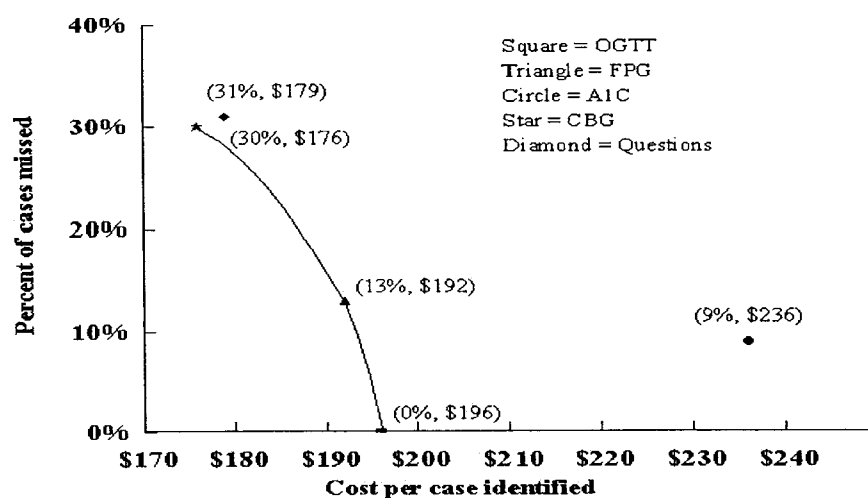

**Figure 1—Proportions of pre-diabetes (either IGT or IFG) and undiagnosed diabetes missed and cost per case identified for individuals age 45–74 years by detection strategy.** OGTT, all eligible individuals received a 2-h OGTT. A1C, all people received an HbA<sub>1c</sub> test, and those who had a value of 5.0% or more would be given an OGTT. FPG, all individuals received a fasting plasma glucose test, and those who had a value between 95 and 110 mg/dl would be given an OGTT. Questions, all individuals responded to the risk assessment questionnaire, and those who scored  $\geq 10$  points were given an OGTT. CBG, all individuals received a CBG test, and those who had a value  $\geq 100$  mg/dl were given an OGTT.

**CONCLUSIONS** — We selected five strategies that can be used for detecting people with pre-diabetes or undiagnosed diabetes and evaluated their effectiveness, total cost of screening all eligible individuals, and their efficiency. Evaluations were performed under two scenarios: screening all individuals age 45–74 years

**Table 4—Percentage of cases identified, total and unit cost from a single payer perspective of a prevalence-based screening for pre-diabetes (IGT or IFG) or undiagnosed diabetes among individuals aged 45–74 years old, assumed lower adherence\***

| Case detection strategies                            | Cases identified (%) | Total medical cost (U.S.\$ billion) |                                                  | Medical costs per case identified (U.S.\$/case) |                                                  |
|------------------------------------------------------|----------------------|-------------------------------------|--------------------------------------------------|-------------------------------------------------|--------------------------------------------------|
|                                                      | All individuals      | All individuals                     | Individuals with BMI $\geq 25$ kg/m <sup>2</sup> | All individuals                                 | Individuals with BMI $\geq 25$ kg/m <sup>2</sup> |
| Testing all with OGTT                                | 50                   | 2.07                                | 1.42                                             | 236                                             | 199                                              |
| FPG testing with a cutoff values $\geq 95$ mg/dl     | 63                   | 2.09                                | 1.19                                             | 189                                             | 155                                              |
| A1C screening with cutoff values of $\geq 5.0\%$     | 46                   | 2.61                                | 1.81                                             | 328                                             | 276                                              |
| CBG screening with cutoff values of $\geq 100$ mg/dl | 35                   | 1.55                                | 1.08                                             | 252                                             | 217                                              |
| Risk assessment questionnaire screening              | 35                   | 1.43                                | 1.00                                             | 237                                             | 202                                              |

\*Assuming adherence of 75% for FPG and 50% for 2-h OGTT.

and screening only individuals age 45–74 years with a BMI  $\geq 25$  kg/m<sup>2</sup>.

To select the most favorable strategy for detecting pre-diabetes and undiagnosed diabetes, both the effectiveness and efficiency of each strategy need to be considered. From Fig. 1, we concluded testing all with OGTT identifies more cases at a lower cost than HbA<sub>1c</sub> screening. Thus, testing all with OGTT was a better detection strategy than HbA<sub>1c</sub> screening. However, the choices among the three screening strategies that were on the efficacy frontier (testing all with OGTT, CBG screening, and FPG testing) were less clear because of the tradeoff between effectiveness and efficiency. Thus, the choice would depend on if the goal of the screening program was to identify more cases or to pursue the lowest cost per case identified. CBG screening and the risk assessment questionnaire were similar with respect to effectiveness and efficiency for detecting pre-diabetes and undiagnosed diabetes.

Screening for pre-diabetes and undiagnosed diabetes among overweight individuals had a lower cost per case identified compared with screening all individuals. This is primarily due to the higher prevalence of pre-diabetes and undiagnosed diabetes in those individuals. Because the relative efficiency of the different strategies did not change, the choice for a favorable screening strategy remains the same whether the screening was conducted among all individuals age 45–74 years or among those with a BMI  $\geq 25$  kg/m<sup>2</sup>.

Taking nonadherence into account, FPG testing would be the best detection strategy. A 75% adherence for FPG alone and 50% adherence for OGTT may be more realistic in the clinical setting. Changing the prevalence of pre-diabetes and undiagnosed diabetes did not affect the proportion of the cases identified but had a moderate impact on the cost per case identified. An additional OGTT to confirm positive cases would increase the cost per case identified but would not affect the relative effectiveness and efficiency of the five strategies.

Our results have two important implications for detecting pre-diabetes or undiagnosed diabetes. First, they can be used for selecting the best strategy for detecting pre-diabetes and undiagnosed diabetes. Second, they indicate that the most favorable cutoff points for screening tests were lower than those recommended in the literature (10–13). Our results indicate that for CBG screening, a random glucose value of  $\geq 100$  mg/dl was a better cutoff value than the usually recommended value of  $\geq 140$  mg/dl (10). For FPG testing, a glucose value of  $\geq 95$  mg/dl was the most favorable cutoff point rather than a value of  $\geq 100$  mg/dl that has been used in screening for undiagnosed diabetes (11). For HbA<sub>1c</sub> screening, our favorable cutoff value of  $\geq 5.0\%$  was lower than the recommended value of  $\geq 5.6\%$  (12), and the value of  $\geq 6.0\%$  used for screening undiagnosed diabetes (13).

Three factors may have contributed to the difference between our results and those of previous studies. First, our selec-

tion of a favorable cutoff point and best strategy were based on both performance (sensitivity and specificity) and the cost of the strategy, whereas previous studies were based only on performance of the screening test. Second, previous studies might have given too much weight to the specificity of a screening test in determining the best cutoff value and the best detection strategy (10,18). In screening for either pre-diabetes or undiagnosed diabetes, true positive cases would ultimately be determined by either the OGTT or the FPG test. A highly specific screening test reduces the number of false-positive cases, thus reducing the number of people who need the OGTT and FPG test and the total cost of screening. If the cost saving resulting from high specificity were outweighed by other cost factors, the unit cost per case identified for that test would be greater than that of a low specificity test. Raising the cutoff value of a test would increase its specificity, but would diminish its sensitivity, thus a lower number of cases would be identified. If the screening cost that was lowered by a higher specificity were outweighed by a reduction in the number of cases identified, the cost per case identified would increase.

Finally, the cutoff value of a screening test for the best detection strategy for pre-diabetes and undiagnosed diabetes may differ from that for detecting undiagnosed diabetes alone. We also calculated the cost per case identified if detecting undiagnosed diabetes was the sole purpose. It appeared that the best cutoff value would

be higher if the purpose of screening changed from identifying both pre-diabetes and undiagnosed diabetes to detecting undiagnosed diabetes only. For example, the cost per case of undiagnosed diabetes identified was \$758 if the cutoff value was  $\geq 110$  mg/dl and \$950 if the cutoff value was  $\geq 95$  mg/dl for FPG testing. Similarly, the cost per case of undiagnosed diabetes identified was \$498 if the cutoff value was  $\geq 120$  mg/dl and \$692 if the cutoff value was  $\geq 100$  mg/dl for CBG screening.

Our study has limitations. First, we were not able to include part of the population, such as individuals who were  $>74$  years or  $<45$  years with a family history of diabetes. This population is recommended for pre-diabetes screening. However, information is not available on the national prevalence of pre-diabetes or the specificity and sensitivity of various detection strategies for identifying pre-diabetes cases in this group. The number of people who need to be screened and the number of pre-diabetes cases in the U.S. population would be larger than our estimates if these other groups were included. Second, we did not impose any cost for pre-diabetes or undiagnosed diabetes cases missed under each detection strategy. For clinicians, the cost of a case missed by using different detection strategies may have different implications due to concerns about liability. Third, we defined a pre-diabetes or undiagnosed diabetes case based on one FPG and OGTT test. While the ADA recommends a confirmation test for diagnosing diabetes, it does not make a similar recommendation for pre-diabetes. Should the intervention be based on more than one positive test of FPG or OGTT, the cost per case identified would be higher than the cost per case identified in our study. Finally, our analyses were for a one-time screening. Our results may not be directly applicable for ongoing screening. One of the major consequences of ongoing screenings is that the number of new cases identified is reduced because of a lower prevalence of pre-diabetes and undiagnosed diabetes in the screening population. The result from our sensitivity analysis showed that a lower prevalence would reduce the number of cases identified and raise the cost per case identified. However, lowering the prevalence would not affect the relative efficiency of the five strategies. Changes in prevalence as a result of ongoing

screening would depend on the frequency of screening. Frequent screenings may lead to a very high cost per case identified if the prevalence is low.

We estimated that most of the examined strategies could identify a case of pre-diabetes or undiagnosed diabetes for  $< \$200$  from a single payer perspective and  $< \$300$  from a societal perspective. The cost per case identified would be lower if the screening was carried out only among people with higher BMIs. However, the cost of case detection is only a small part of the overall cost of implementing a pre-diabetes screening program. A more important and costly task is ensuring appropriate treatment for the identified individuals. Regarding the question whether screening for pre-diabetes is a worthwhile public health investment, the cost of detection and appropriate treatments is only a part of the equation. The answer to the question is perhaps largely determined by the long-term health benefit of treating pre-diabetes. Unfortunately, we currently have little information on this issue. The ongoing DPP follow-up study will provide an answer for this question in the future. If the benefit of preventing or delaying diabetes can be translated into long-term health benefits by preventing diabetes complications, screening and treating pre-diabetes are likely to be good public health investments. Future studies should evaluate the entire costs and benefits of screening programs, including the cost of both detection and treatment as information becomes available.

Primary prevention is a new and visible means to combat the growing epidemic of diabetes. While several strategies can be used for screening individuals with pre-diabetes, not all of the strategies are the same in terms of effectiveness and efficiency. Information provided here can be used by physicians and public policymakers in choosing a strategy if pre-diabetes screening is carried out as currently recommended.

**Acknowledgment**—The authors acknowledge Theodore J. Thompson, MS, for review and helpful suggestions on the manuscript.

## References

1. Narayan KM, Gregg EW, Fagot-Campagna A, Engelgau MM, Vinicor F: Diabetes: a common, growing, serious, costly, and potentially preventable public health problem. *Diabetes Res Clin Pract* 50:S77–84, 2000
2. Mokdad AH, Bowman BA, Ford ES, Vinicor F, Marks JS, Koplan JP: The continuing epidemics of obesity and diabetes in the United States. *JAMA* 286:1195, 2001
3. Pan XR, Li GW, Hu YH, Wang JX, Yang WY, An ZX, Hu ZX, Lin J, Xiao JZ, Cao HB, Liu PA, Jiang XG, Jiang YY, Wang JP, Zheng H, Zhang H, Bennett PH, Howard BV: Effects of diet and exercise in preventing NIDDM in people with impaired glucose tolerance: the Da Qing IGT and Diabetes Study. *Diabetes Care* 20:537–544, 1997
4. Tuomilehto J, Lindstrom J, Eriksson JG, Valle TT, Hamalainen H, Ilanne-Parikka P, Keinänen-Kiukaanniemi S, Laakso M, Louheranta A, Rastas M, Salminen V, Uusitupa M, Finnish Diabetes Prevention Study Group: Prevention of type 2 diabetes mellitus by changes in lifestyle among subjects with impaired glucose tolerance. *N Engl J Med* 344:1343–1350, 2001
5. Diabetes Prevention Research Group: Reduction in the evidence of type 2 diabetes with life-style intervention or metformin. *N Engl J Med* 346:393–403, 2002
6. American Diabetes Association: The prevention or delay of type 2 diabetes. *Diabetes Care* 25:742–749, 2002
7. Bureau of the Census: *Population Projections of the United States by Age, Race, and Hispanic Origin: 1995 to 2050. Current Population Reports*, P25–1130. Washington, DC, U.S. Government Printing Office, 1996
8. National Center for Health Statistics: *Third National Health and Nutrition Examination Survey, 1988–1994, Reference Manuals and Reports: Manual for Medical Technicians and Laboratory Procedures Used for NHANES III (CD-ROM)*. Hyattsville, MD, Centers for Disease Control and Prevention, 1996. Available from National Technical Information Service, Springfield, VA, in Acrobat PDF format with Acrobat Reader 2.0 access software, Adobe Systems
9. Agency for Health Care Policy and Research: *Health Care Use in America-1996*. Rockville, MD, Agency for Health Care Policy and Research, May 1999 (AHCPR publ. no. 99-0029)
10. Rolka DB, Narayan KM, Thompson TJ, Goldman D, Lindenmayer J, Alich K, Bacall D, Benjamin EM, Lamb B, Stuart DO, Engelgau MM: Performance of recommended screening tests for undiagnosed diabetes and dysglycemia. *Diabetes Care* 24:1899–1903, 2001
11. Lauritzen T, Griffin S, Borch-Johnsen K, Wareham NJ, Wolffenbuttel BHR, Rutten G, for ADDITION Study Group: The AD-

- DITION study: proposed trial of the cost-effectiveness of an intensive multifactorial intervention on morbidity and mortality among people with type 2 diabetes detected by screening. *Int J Obes* (Suppl. 3): S6–S11, 2000
12. Rohlffing CL, Little RR, Wiedmeyer HM, England JD, Madsen R, Harris MI, Flegal KM, Eberhardt MS, Goldstein DE: Use of GHb (HbA<sub>1c</sub>) in screening for undiagnosed diabetes in the U.S. population. *Diabetes Care* 23:187–191, 2000
13. Edelman D, Edward LJ, Olsen MK, Dudley TK, Harris AC, Blackwell DK, Oddone EZ: Screening for diabetes in an outpatient clinic population. *J Gen Intern Med* 17:23–28, 2002
14. Expert Committee on the Diagnosis and Classification of Diabetes Mellitus: Report of the Expert Committee on the Diagnosis and Classification of Diabetes Mellitus. *Diabetes Care* 26 (Suppl. 1):S5–S20, 2003
15. Alberti KG, Zimmet PZ: Definition, diagnosis, and classification of diabetes mellitus and its complications: diagnosis and classification of diabetes mellitus: provisional report of a WHO consultation. *Diabetes Med* 15:539–553, 1998
16. Health Care Financing Administration (HCFA) [article online], 2001. Available from <http://www.hcfa.gov/stats/cpt/clfdwn.htm>. Accessed 10 July 2001
17. HealthCare Consultants of America, Inc: *Physicians Fee and Coding Guide*. 12th ed. Augusta, GA, HealthCare Consultants of America, Inc, 2000
18. Garkovich L, Harris R: Health and health care in rural America. *Choice* 9:8–12, 1994
19. U.S. Office of Personnel Management of U.S. government [article online], 2001. Available from <http://www.opm.gov>. Accessed 10 July 2001
20. U.S. Department of Labor, Bureau of Labor Statistics: National Compensation Survey: Occupational Wages in the United States [article online], 2001. Available from <http://www.bls.gov/ncs/ocs/home.htm>. Accessed 10 July 2001
21. Benjamin SM, Valdez R, Geiss LS, Rolka DB, Narayan, KM: Estimated number of adults with prediabetes in the U.S. in 2000: opportunities for prevention. *Diabetes Care* 26:645–649, 2003
